# Supplementary material
Source: PubMed Central journal article supplement (PMC1590056)

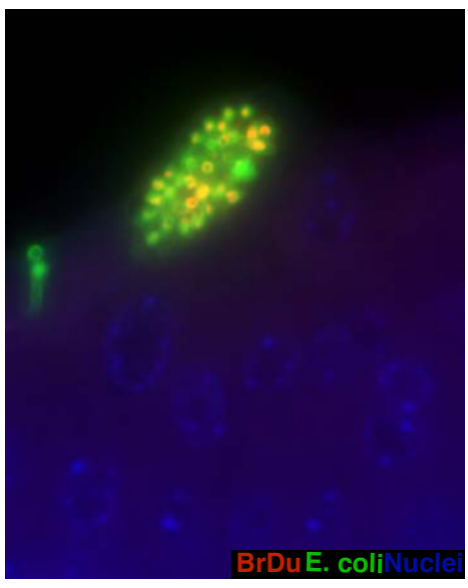

BrDu E. coli Nuclei

Supplement: pnas_0602136103_1.pdf [file pnas_0602136103_1.pdf]

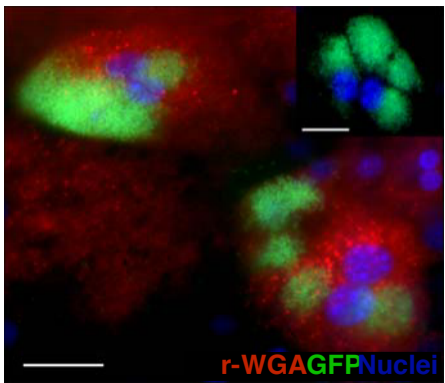

Supplement: pnas_0602136103_2.pdf [file pnas_0602136103_2.pdf]

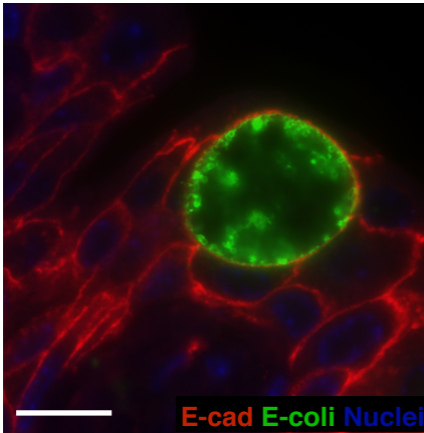

Supplement: pnas_0602136103_3.pdf [file pnas_0602136103_3.pdf]

Superficial facet cells  
Underlying transitional cells

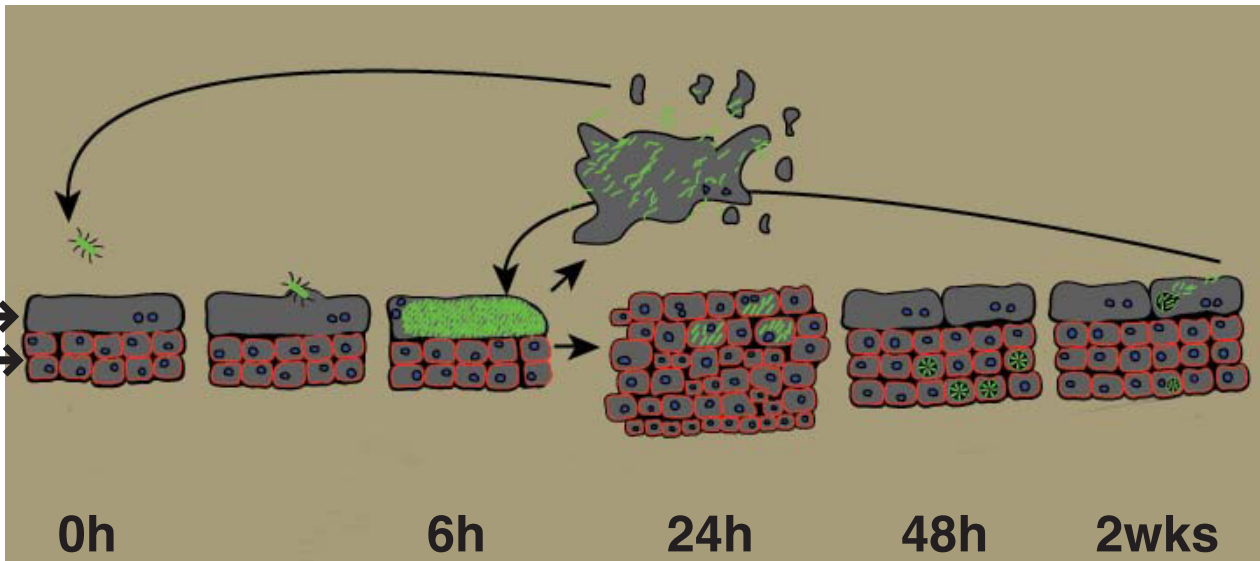

Supplement: pnas_0602136103_4.pdf [file pnas_0602136103_4.pdf]
